# Supplementary material
Source: Royal Society of Chemistry journal article supplement (doi:10.1039/d6tb00396f)
Supplement: d6tb00396f1.pdf [file d6tb00396f1.pdf]

1 Cucurbit-Derived Exosome-like Nanovesicles Encapsulating  
2 Epigallocatechin Gallate for Skin Depigmentation: Molecular Docking,  
3 Stability, and Efficacy in B16/F10 Cells and Zebrafish

4 Li Tao <sup>a,b,e</sup>, Ping Wang <sup>a,b,e</sup>, Mengying Zhang <sup>a,b,e</sup>, Wenyue Zhang <sup>a,b</sup>, Rui Zhang <sup>a,b</sup>,  
5 Junhao Tao <sup>a,b</sup>, Mingyuan Chen <sup>a,b</sup>, Jing Wu <sup>c</sup>, Kawagishi Hirokazu <sup>d</sup>, Peishi Feng <sup>\*a,b,e</sup>

6 <sup>a</sup> School of Pharmacy, Zhejiang University of Technology, Hangzhou 310014, China

7 <sup>b</sup> Zhejiang Provincial Key Laboratory of TCM for Innovative R & D and Digital Intelligent  
8 Manufacturing of TCM Great Health Products, Hangzhou 310014, China

9 <sup>c</sup> Faculty of Agriculture, Iwate University, Morioka, Iwate 020-8550, Japan

10 <sup>d</sup> Graduate School of Agriculture, Shizuoka University, Shizuoka 422-8529, Japan.

11 <sup>e</sup> Zhejiang International Scientific & Technological Cooperation Base of Development and  
12 Utilization of Natural Products, Zhejiang University of Technology, Hangzhou 310014, China.

13 \* Corresponding author Peishi Feng , E-mail address: [fengpeishi@zjut.edu.cn](mailto:fengpeishi@zjut.edu.cn)

14

15

16

17

18

19

20

21

22

23

## 24 **Supplementary data**

### 25 **Materials and methods**

#### 26 **Isolation and Purification of CEVs**

27 Fresh cucumbers acquired from the farmers' market in Liaocheng City of  
28 Shandong Province were sequentially washed with tap water, deionized water and  
29 pre-cooled PBS (0.01 M, pH 7.2). Following the peeling and dicing process, the  
30 tissues were disrupted in chilled PBS at 4:1 (w/w) in a high-speed tissue disruptor  
31 (BARBOSA, Germany) at 25,000 rpm for 30 seconds. The homogenate was then  
32 filtered through a 200 mesh nylon sieve. The filtrate was centrifuged twice, first at  
33  $1500 \times g$  for 15 min at 4 °C to form a pellet for removal of large cellular debris; then  
34 at  $6000 \times g$  for 25 min. The resulting heavier pellet was collected at  $10000 \times g$  for 40  
35 min. The supernatant was filtered through membranes 0.45  $\mu\text{m}$  and 0.22  $\mu\text{m}$  PES to  
36 check its sterility and remove larger particles.

37 An amount of PEG-6000 was added to give a final concentration of 10% (w/v)  
38 and kept at 4 °C for 16 h to induce vesicle aggregation and centrifuged at 8000 g for  
39 30 min at 4 °C. After resuspending the pellet in PBS, the substance was centrifuged  
40 once more under similar circumstances ( $8,000 \times g$ , 30 min) to remove residual  
41 contaminants. It ended up as a semi-purified CEVs suspension.

42 The suspension was dialyzed against glycine-Tris buffer (mass ratio 4.8:1, pH  
43 8.3) using a regenerated cellulose membrane (300 kDa MWCO) under a constant  
44 current of 300 mA (Bio-Rad PowerPac™) for five 30-minute cycles, with buffer  
45 replacement between cycles. The sample was concentrated using a 100 kDa  
46 centrifugal ultrafiltration (Millipore, USA) unit at  $4,000 \times g$  for 20 min. The  
47 concentrated pellet was resuspended in 5 ml of PBS. The CEVs concentration was  
48 quantified using the BCA assay (PBeyotime Biotechnology, China), and aliquots  
49 were stored at -80 °C for further use.

#### 50 **HPLC Analysis Conditions for EGCG**

51 The mobile phase consisted of 0.1% (v/v) formic acid in water (solvent B) and  
52 acetonitrile (solvent A) under gradient elution conditions. The flow rate was  
53 maintained at 1.0 mL/min, the detection wavelength was set at 280 nm, and the  
54 injection volume was 7  $\mu$ L. EGCG was identified based on its characteristic retention  
55 time ( $6.9 \pm 0.1$  min) and quantified using an external calibration curve exhibiting a  
56 correlation coefficient ( $R^2$ ) greater than 0.999.

$$57 \quad Y = 8475.6567X - 65.4457 \quad R^2 = 0.9998$$

58 where  $Y$  is peak area and  $X$  is concentration (mg/mL).

59

## 60 **Composition Analysis of CEVs**

61

### 62 *Sample Preparation*

63 After thawing, the sample was thoroughly vortexed to ensure homogeneity.  
64 Subsequently, 200  $\mu$ L of the thawed sample was combined with 500  $\mu$ L of a 70%  
65 methanol aqueous solution containing an internal standard, and the mixture was  
66 vortexed continuously for 2 min to achieve complete extraction. The resulting mixture  
67 was rapidly frozen in liquid nitrogen for 5 min, thawed on ice for 5 min, and vortexed  
68 for 2 min to maintain consistency; this freezing-thawing-vortexing sequence was  
69 repeated 3 times. Afterward, the sample underwent centrifugation at 12,000 rpm for  
70 10 minutes at 4  $^{\circ}$ C. The entire supernatant was isolated and concentrated to complete  
71 dryness. Upon reaching a dry state, it was reconstituted with 100  $\mu$ L of a 70%  
72 methanol aqueous solution without an internal standard, vortexed for 3 minutes to  
73 ensure resuspension, and sonicated in an ice water bath for 10 minutes to optimize  
74 dissolution. This was followed by another centrifugation step at 12,000 rpm for 3  
75 minutes at 4  $^{\circ}$ C. Finally, the clarified supernatant was transferred to an inner tube of  
76 an injection vial and stored for subsequent LC-MS/MS analysis.

### 77 *UPLC-ESI-MS/MS Analysis*

78 Chromatographic and mass spectrometric analysis was performed in  
79 configuration UPLC-ESI-MS/MS (exionlc ultra-performance liquid chromatography

80 system (<https://sciex.com.cn/>) and tandem mass spectrometry detector) on sample  
81 extracts. We utilized an Agilent SB-C18 column (1.8  $\mu\text{m}$  particle size, 2.1 mm  
82 internal diameter  $\times$  100 mm length) as well as a mobile phase containing solvent A  
83 (pure water containing 0.1% formic acid) and solvent B (acetonitrile containing 0.1%  
84 formic acid). For the sample elution, a gradient method was used, starting with 95%  
85 solvent A and 5% solvent B, and after 9 minutes, the composition was linearly shifted  
86 to 5% solvent A and 95% solvent B and held for 1 minute. The solution was  
87 immediately increased to 95% solvent A and 5% solvent B for a total of 1.1 min, then  
88 maintained for a total of 2.9 min. The flow rate was 0.35 mL/min, column  
89 temperature was kept at 40  $^{\circ}\text{C}$ , injection volume was two  $\mu\text{L}$ , with column effluent  
90 being continuously interfaced to an ESI-triple quadrupole-linear ion trap (QTRAP)-  
91 MS for simultaneous detection.

92 The triple quadrupole mass spectrometer operated with an ESI source at 500  $^{\circ}\text{C}$ .  
93 The voltage used for ion spray was set to 5500 V (positive ion mode) and -4500 V  
94 (negative ion mode). Gas I (GSI) was maintained at 50 psi. Gas II (GSII) was  
95 regulated at 60 psi. The curtain gas (CUR) was regulated at a pressure of 25 psi.  
96 Dissociation of collision activation type was set to high. MRM scans were carried out  
97 using nitrogen as the collision gas at an intermediate pressure. The declustering  
98 potential (DP) and collision energy (CE) parameters were subsequently optimized for  
99 each MRM transition individually. In case of different elution ranges, monitoring was  
100 confined to only those MRM transitions of metabolites eluted at that timing.

### 101 **Cellular uptake**

102 PKH67 (2  $\mu\text{L}$ ) was diluted in 10  $\mu\text{L}$  PBS to prepare the working solution. Then,  
103 50  $\mu\text{L}$  exosome suspension (CEVs or EGCG@CEVs) was incubated with PKH67 for  
104 10 min at RT (room temperature) in the dark. Unbound dye was removed by  
105 centrifugation at  $12,000 \times g$  for 10 min using a 100 kDa filter.

106 B16F10 cells were seeded in 24-well plates in DMEM with 10% FBS. After  
107 reaching 60% confluence, cells were serum-starved overnight in FBS-free DMEM to

108 synchronize them. Labeled exosomes (CEVs-PKH67 or EGCG@CEVs-PKH67) were  
109 added and incubated at 37 °C with 5% CO<sub>2</sub> for 24 h.

110 Post-incubation, cells were washed with PBS, fixed with 4% paraformaldehyde  
111 for 15 min at RT, and permeabilized with 0.2% Triton X-100 for 10 min at RT. Then,  
112 cells were incubated with Alexa Fluor 488-phalloidin (2 drops/mL in PBS) for 30 min  
113 at 37 °C in the dark, followed by PBS washes.

114 After aspirating phalloidin, nuclei were stained with 1 µg/mL DAPI for 5 min.  
115 Excess DAPI was washed with PBS, and coverslips were mounted with antifade  
116 medium. Internalization of exosomes and the cytoskeleton was visualized by confocal  
117 microscopy (excitation/emission: 488/525 nm for PKH67, 405/461 nm for DAPI).

## 118 **Network Pharmacology Analysis**

### 119 *Identification and Compilation of Targets for Potential Active Constituents in CEVs*

120 The SMILES notations of the chemical constituents identified via UPLC-M  
121 S/MS analysis were retrieved from the PubChem database ([https://pubchem.ncbi.  
122 nlm.nih.gov/](https://pubchem.ncbi.nlm.nih.gov/)) and submitted to the Swiss Target Prediction platform ([http://ww  
123 w.swisstargetprediction.ch/](http://www.swisstargetprediction.ch/)) to predict potential biological targets. The Swiss Tar  
124 get Prediction platform uses molecular chemical structure, ligand similarity, cros  
125 s-validation, and permutation analysis to predict targets for bioactive molecules.  
126 All target predictions were restricted to the model organism *Homo sapiens*

### 127 *Screening of Targets of CEVs Against pigmentation*

128 Pigmentation-associated targets were identified using the GeneCards  
129 (<https://www.genecards.org/>) and OMIM (<https://omim.org/>) databases. After  
130 removing duplicates and filtering, a list of pigmentation-related targets was compiled.  
131 GeneCards targets were filtered for precision using a relevance score  $\geq 4.5$ . CEVs-  
132 associated targets were intersected with disease-related targets using Venny 2.1.0  
133 (<http://www.liuxiaoyuyuan.cn/>). Overlapping targets were analyzed to identify those  
134 mediating the anti-pigmentation effects of CEVs. A drug component-gene network  
135 was constructed to depict the relationships between constituents and targets,

136 elucidating mechanisms of action. In Cytoscape 3.9.01, active components of CEVs  
137 and their potential therapeutic targets (intersecting targets) for pigmentation were  
138 incorporated. Nodes represented the components and target proteins. Topological  
139 analysis using the CytoNCA plugin identified key CEV components for anti-  
140 pigmentation based on node degree.

#### 141 **Investigation of Protein-Protein Interactions**

142 Protein-protein interactions (PPIs) indicate associations between proteins. In  
143 intersecting genes were analyzed using the STRING database ([https://cn.string-db.  
144 org/](https://cn.string-db.org/)), with Homo sapiens as the organism and a confidence score  $\geq 0.4$ ; disco-  
145 nected nodes were excluded. The PPI network was visualized with Cytoscape  
146 3.9.1. Topological parameters (closeness, degree and betweenness) were comput-  
147 ed using the Centiscape plugin 2.2. Nodes were prioritized based on degree, id-  
148 entifying the top 10 targets as core candidates for CEVs in pigmentation thera-  
149 py. Biologically meaningful genes were identified with high parameter values,  
150 which simplifies the PPI network.

#### 151 **Gene Ontology (GO) and Kyoto Encyclopedia of Genes and Genomes (KE 152 GG) Pathway Enrichment Analysis**

153 Functional enrichment analyses using GO and KEGG pathways were cond-  
154 ucted to delineate the molecular mechanisms underlying CEVs' anti-pigmentatio-  
155 n activity. The analyses have linked potential targets with various biological pr-  
156 ocesses and signalling pathways. Using DAVID (<https://david.ncifcrf.gov/>), the o-  
157 verlapping genes were functionally annotated for their Molecular Functions (MF),  
158 Biological Processes (BP), Cellular Components (CC), and KEGG pathways. Th-  
159 e bioinformatics platform (<http://www.bioinformatics.com.cn/>) was used to visual-  
160 ize the results.

#### 161 **Molecular docking**

162 Molecular docking was performed to analyze the binding affinity of the ac-  
163 tive ingredients in CEVs with the target protein. Ligand 2D structures were ob-

164 tained from PubChem (<http://pubchem.ncbi.nlm.nih.gov/>), converted to 3D using  
165 ChemOffice 20.0, and exported as MOL2 files. Protein crystal structures were  
166 obtained from the RCSB PDB (<http://www.rcsb.org/>) and preprocessed with Py  
167 MOL 2.6.0 to remove water and phosphate groups, saving the resulting structur  
168 es as PDB files. Ligand energy minimization, protein preprocessing, and bindin  
169 g pocket identification were performed using MOE 2019. Docking simulations  
170 were performed in MOE 2019 with 50 runs. Binding affinity was quantified us  
171 ing energy values: below -4.25 kcal/mol (moderate), -5.0 kcal/mol (good), and  
172 -7.0 kcal/mol (strong). Interactions and binding sites were visualized using PyM  
173 OL 2.6.0 and Discovery Studio 2019

174

175

176

177

178

179

180

181

182

183

184

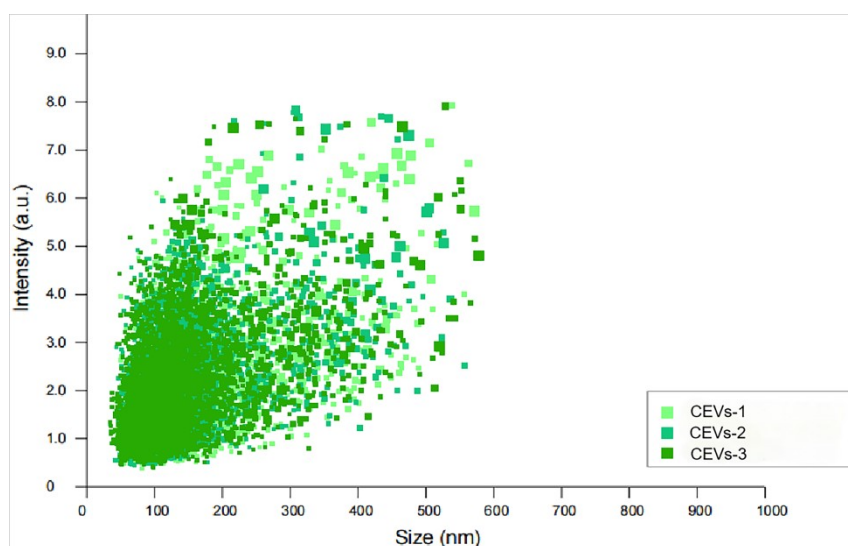

185

186

187 **Fig. S0.** Intensity/Size distribution from three replicate NTA measurements of CEVs

188

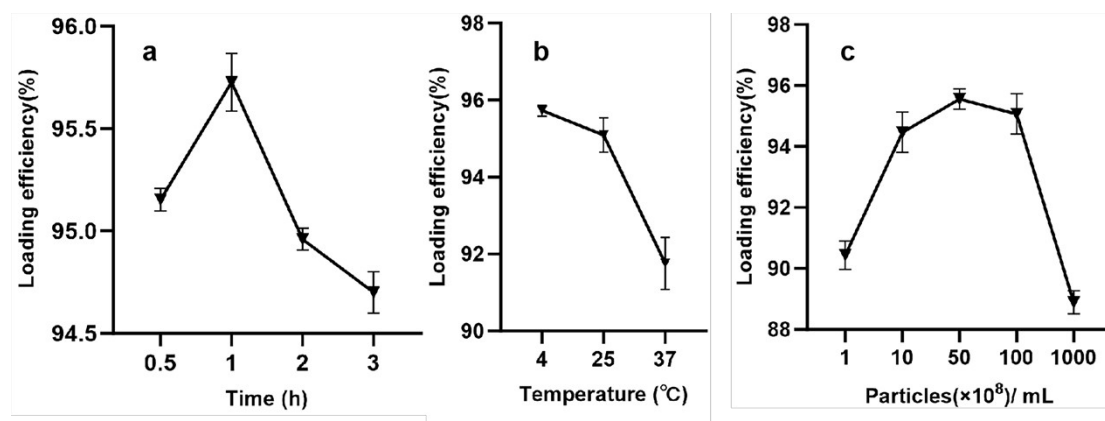

189

190 **Fig. S1.** Effects on loading efficiency: (a) time, (b) temperature, (c) concentration

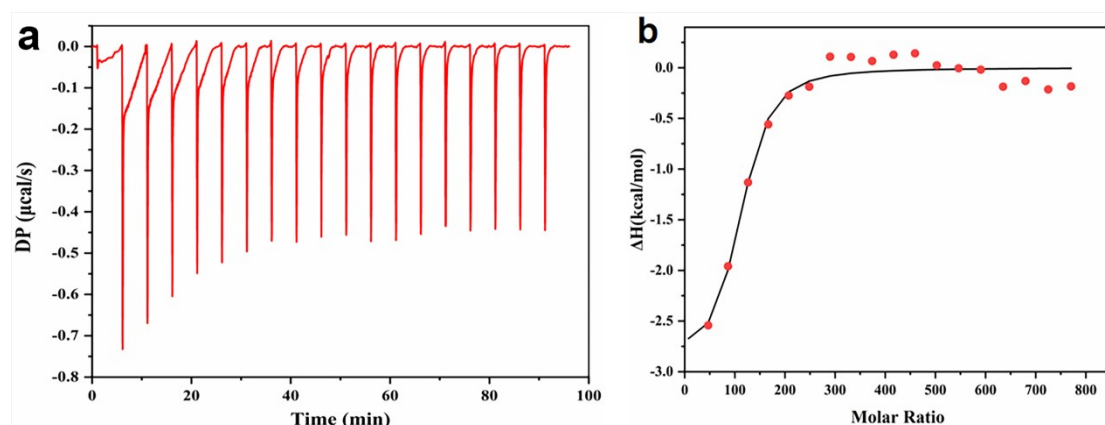

191

192 **Fig. S2.** Thermograms (a) and binding isotherms (b) corresponding to the titration of

193

4 mM EGCG with CEVs.

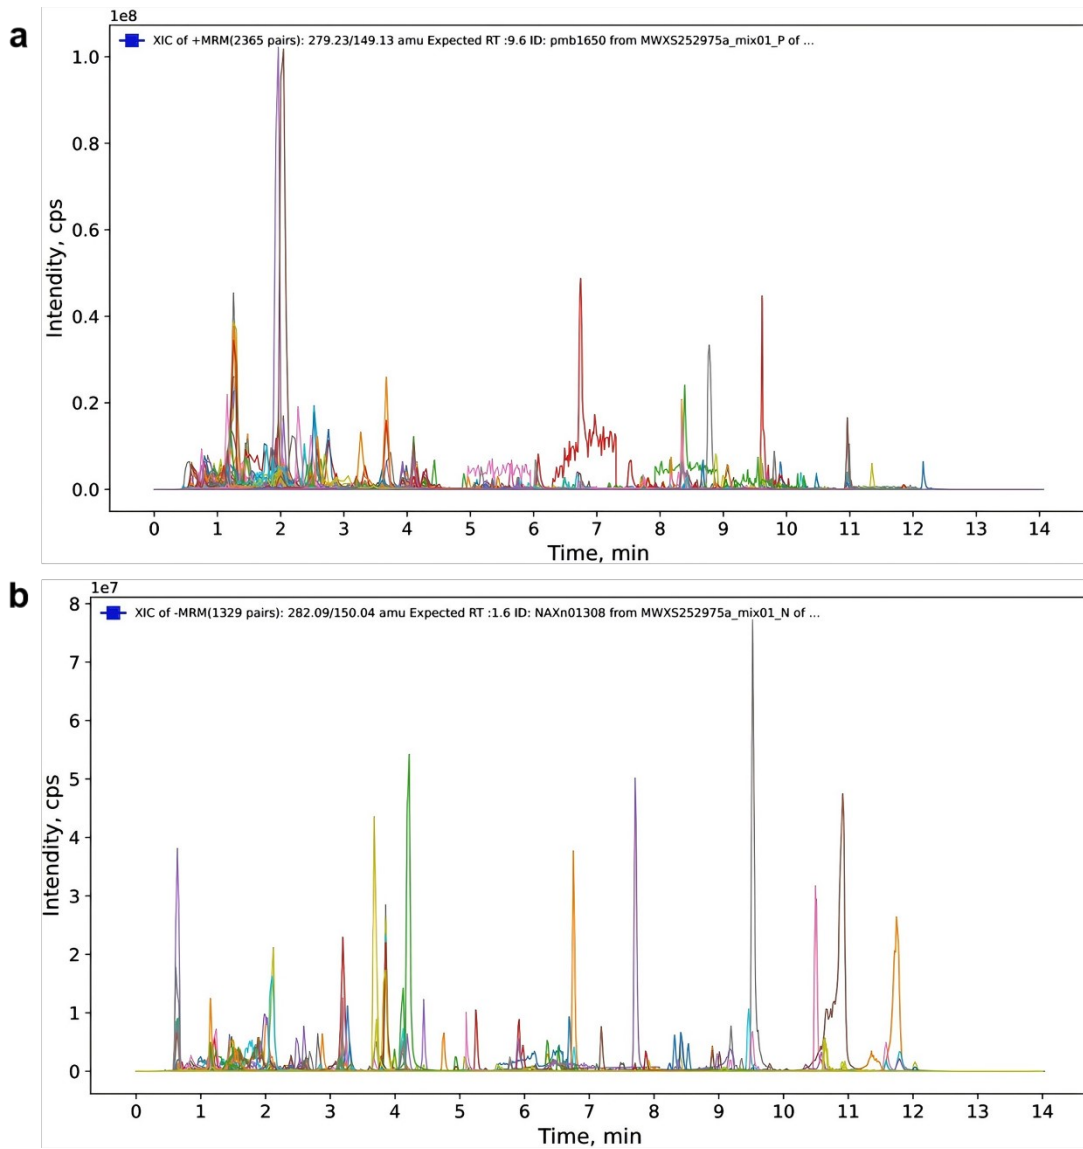

195

196 **Fig. S3.** Multi-peak plots of MRM metabolite detection in positive ion mode (a) and

197

negative ion mode (b) mixed quality control (QC) samples.

198

199

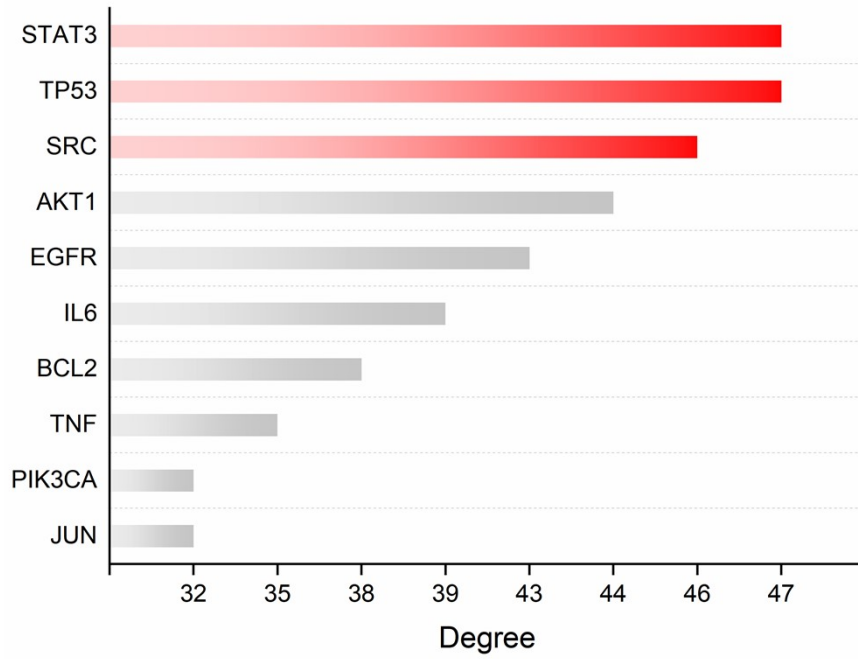

200

201

**Fig. S4** Top 10 potential targets based on degree values

202

203

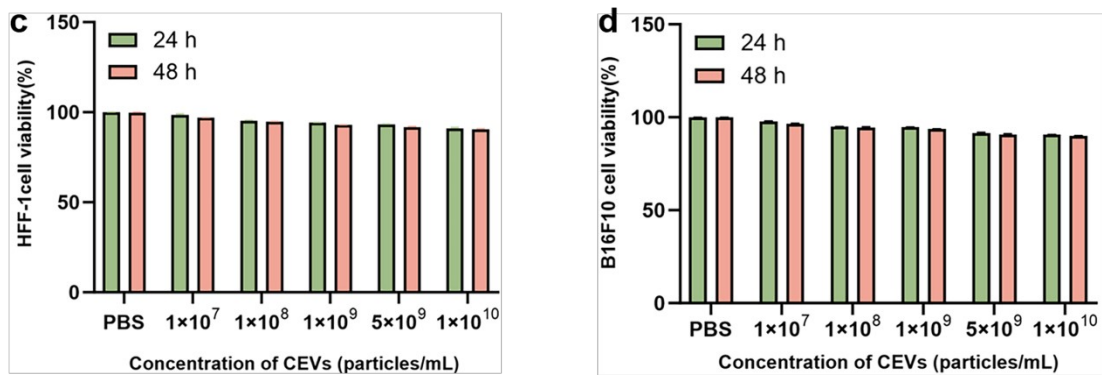

204

205

206

207

**Fig. S5.** The effect of CEVs on HFF-1 and B16F10 cell proliferation by CCK8 assay

208

209

210

211

212

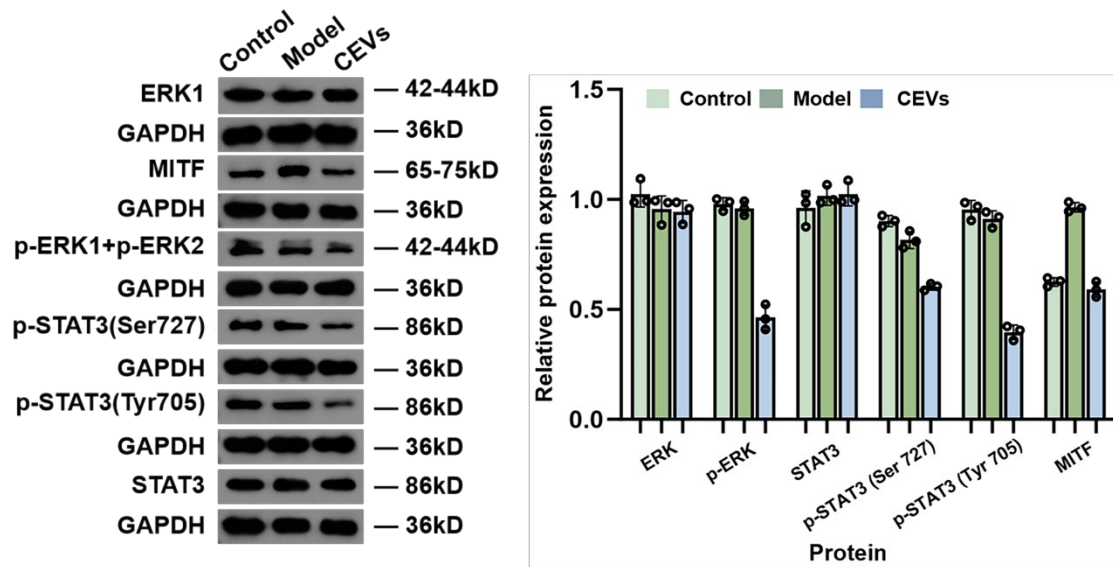

213

214 **Fig. S6.** The CEVs inhibits the  $\alpha$ -MSH-induced activation of the ERK-STAT3-MITF  
 215 pathway. (a) Representative western blot images showing protein levels in the  
 216 validation experiment (Control, Model, and Treatment groups). (b) Quantitative  
 217 analysis of target proteins.

218

219

220

221

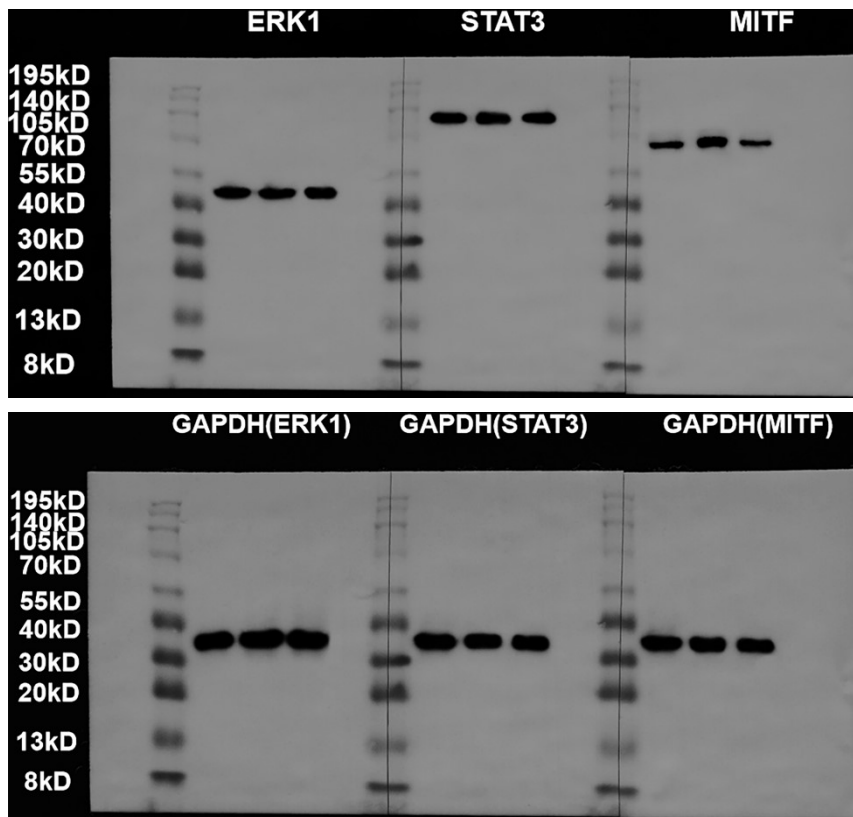

222

223

224

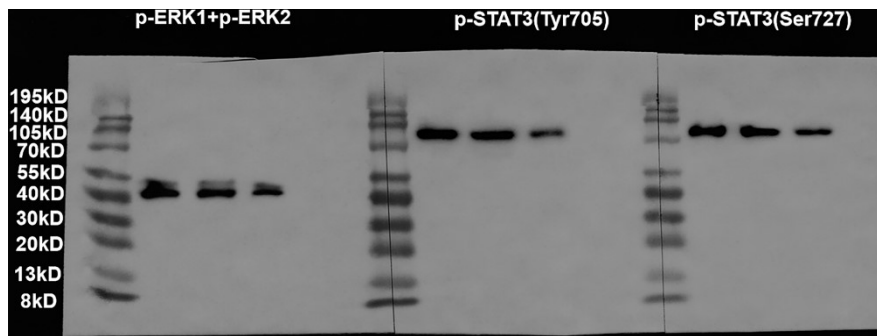

225

226

227

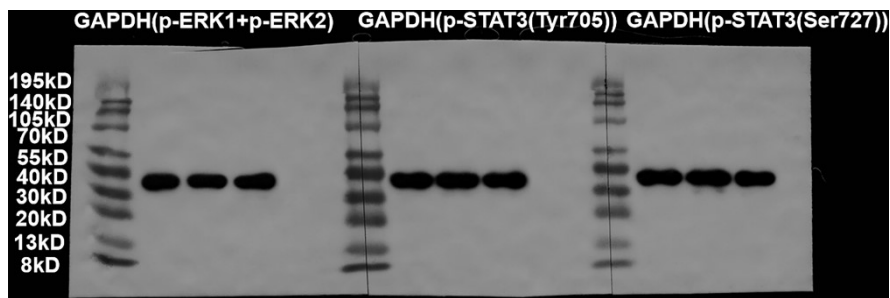

**Fig. S7.** Raw western blot data for Fig.S6

228

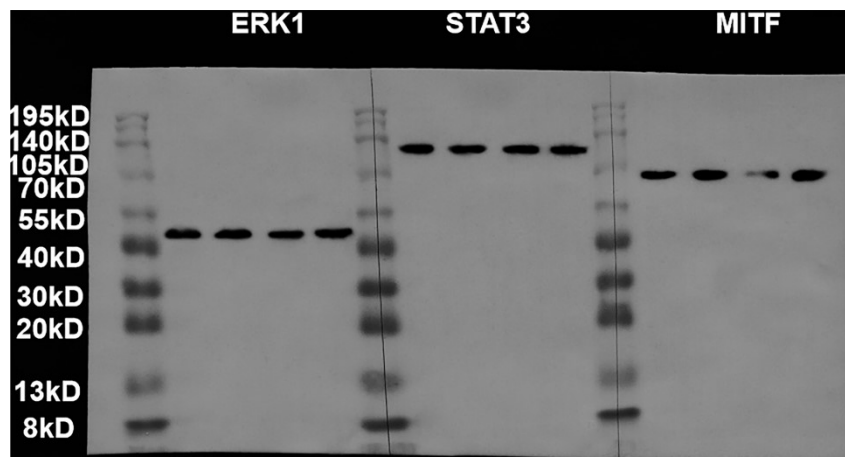

229

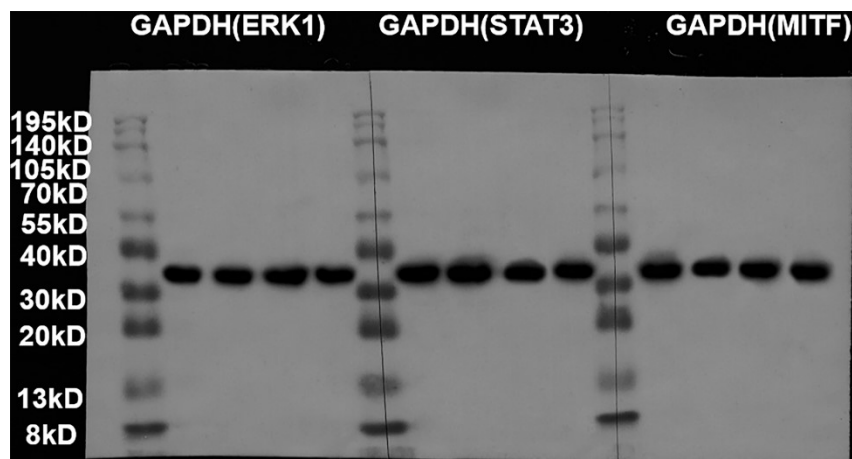

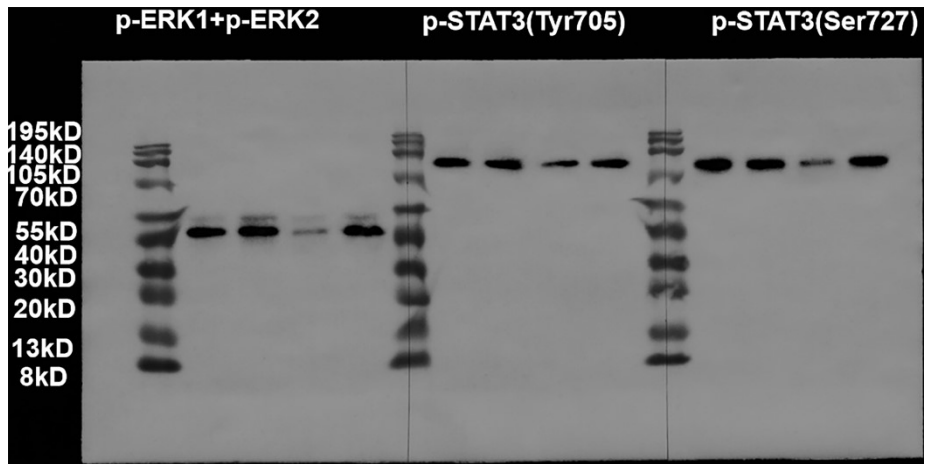

230

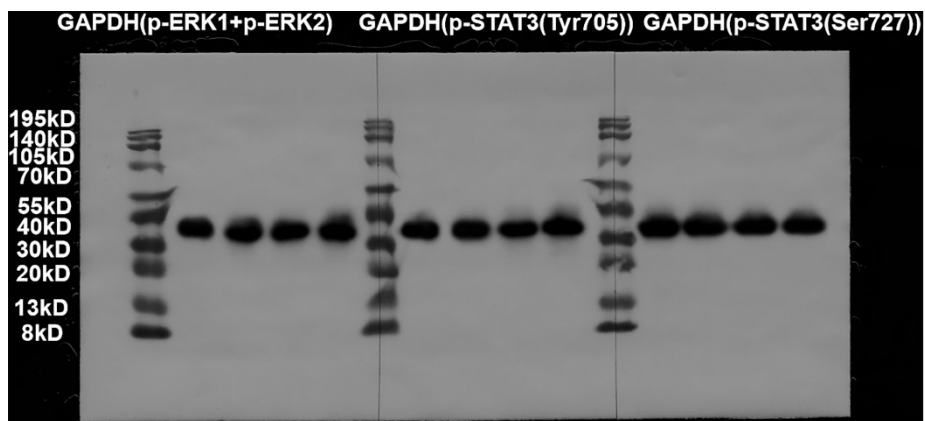

231

232

233

234

**Fig. S7.** Raw western blot data for Fig.9

235

236

237

238

239

240

241

242

243

244

245

246

247

248

249

250

251

252

253  
254  
255

**Table S1** Thermodynamic parameters determined using ITC

|           | KD(M)   | $\Delta H$ (kcal/mol) | $\Delta S$ (kcal/mol) | $-T\Delta S$ (kcal/mol) |
|-----------|---------|-----------------------|-----------------------|-------------------------|
| EGCG→CEVs | 9.12e-6 | -2.93                 | -6.88                 | -3.95                   |

256  
257  
258  
259

**Table S2** Release Kinetic Models of EGCG from CEVs

| Models               | Linear fitting( $Q=M_t/M_{max}$ ) | R <sup>2</sup>       |
|----------------------|-----------------------------------|----------------------|
| Zero-order kinetics  | $Q \sim t$                        | 0.9368               |
| First-order kinetics | $-\ln(1-Q) \sim t$                | 0.9537               |
| Higuchi model        | $Q \sim t^{0.5}$                  | 0.9673               |
| Korsmeyer-Peppas     | $Q \sim t^n$                      | 0.9654, $n = 0.7231$ |

260  
261  
262  
263

**Table S3** Representative Compounds from the Top 400 for Hyperpigmentation Therapy

| Number | Compounds                                                                          | Formula    | CEVs        |
|--------|------------------------------------------------------------------------------------|------------|-------------|
| 1      | (2S)-2-(methylamino)pentanoic acid                                                 | C6H13NO2   | 182664546.2 |
| 2      | 2-Decanol*                                                                         | C10H22O    | 157311928.8 |
| 3      | 1-Decanol*                                                                         | C10H22O    | 150175452   |
| 4      | cis,cis-Muconate*                                                                  | C6H6O4     | 99688778.47 |
| 5      | 2-[[2-amino-3-(4-hydroxyphenyl)propanoyl]amino]-3-methylpentanoic acid             | C15H22N2O4 | 77766701.97 |
| 6      | 2-Methylpyrrolidine-2-carboxylic acid*                                             | C6H11NO2   | 72387679.89 |
| 7      | 4-methoxybenzamide                                                                 | C8H9NO2    | 69295024.76 |
| 8      | Lidocaine                                                                          | C14H22N2O  | 68149574.7  |
| 9      | (5R)-5-(methylaminomethyl)oxolan-2-one*                                            | C6H11NO2   | 65288419.93 |
| 10     | 2-Oxo-2,3-dihydrofuran-5-acetate*                                                  | C6H6O4     | 54937204.93 |
| 11     | (2R,4R)-4-methylpyrrolidine-2-carboxylic acid                                      | C6H11NO2   | 47313022.81 |
| 12     | 4-Methylazetididine-2-Carboxylic acid                                              | C5H9NO2    | 45346385.85 |
| 13     | 13-(methoxymethyl)-10,11,11-trimethyltetracyclo[8.2.1.01,5.08,12]tridec-6-en-13-ol | C18H28O2   | 45072406.95 |
| 14     | 8-Hydroxyquinoline                                                                 | C9H7NO     | 42615912.79 |
| 15     | (2R)-5-oxoxolane-2-carboxamide                                                     | C5H7NO3    | 33024080.53 |
| 16     | Choline                                                                            | C5H14NO+   | 29602219.14 |
| 17     | Indole-4-Carboxaldehyde*                                                           | C9H7NO     | 29446611.97 |
| 18     | L-Pipecolate                                                                       | C6H11NO2   | 28169923.23 |

|    |                                                                                             |            |             |
|----|---------------------------------------------------------------------------------------------|------------|-------------|
| 19 | Piperidine                                                                                  | C5H11N     | 26082147.56 |
| 20 | 2-n-Propyl-3-pentenoic acid                                                                 | C8H14O2    | 24177948.7  |
| 21 | 2-n-Propyl-4-pentenoic acid                                                                 | C8H14O2    | 23440263.74 |
| 22 | Embelin                                                                                     | C17H26O4   | 22203061.57 |
| 23 | Dillapiole                                                                                  | C12H14O4   | 21836619.84 |
| 24 | furo[2,3-h]quinoline                                                                        | C11H7NO    | 21792433.65 |
| 25 | 6-Deoxyfagomine                                                                             | C6H13NO2   | 21382210.05 |
| 26 | Arcapillin                                                                                  | C18H16O8   | 20032094.47 |
| 27 | 2-Phenylpropylamine*                                                                        | C9H13N     | 19600173.6  |
| 28 | N-(3-hydroxy-4-methoxyphenethyl)-4-hydroxybutanamide                                        | C14H21NO4  | 19564454.2  |
| 29 | Amphetamine*                                                                                | C9H13N     | 18875814.71 |
| 30 | Dextropimaric acid                                                                          | C18H28O2   | 15506125.66 |
| 31 | isoemodin                                                                                   | C15H10O5   | 15297373.36 |
| 32 | Emodin                                                                                      | C15H10O5   | 14404640.72 |
| 33 | 3-Chloroaniline                                                                             | C6H6ClN    | 13629690.16 |
| 34 | Lumichrome                                                                                  | C12H10N4O2 | 13504973.61 |
| 35 | (1R,2S,4S)-6-methoxy-4,7-dimethyl-1-(propan-2-yl)-1,2,3,4-tetrahydronaphthalen-2-yl acetate | C18H26O3   | 13009809.7  |
| 36 | Lamprolobine                                                                                | C15H24N2O2 | 12798655.9  |
| 37 | 3-Hydroxylup-20(29)-en-28-al (Betulinaldehyde)                                              | C30H48O2   | 12395055.07 |
| 38 | N-Acetylintole-3-carboxaldehyde*                                                            | C11H9NO2   | 11984436.82 |
| 39 | Trisporic Acid A                                                                            | C18H26O3   | 11841407.56 |
| 40 | 4',5,6,7-Tetramethoxyflavanone                                                              | C19H20O6   | 11632449.87 |
| 41 | Succinate*                                                                                  | C4H6O4     | 11604457.93 |
| 42 | Tetradecyldiethanolamine                                                                    | C18H39NO2  | 11332243.42 |
| 43 | Podocarp-7-en-3-one*                                                                        | C17H26O    | 10779765.01 |
| 44 | Octadec-2-enamide*                                                                          | C18H35NO   | 10764264.28 |
| 45 | Octadec-8-enamide*                                                                          | C18H35NO   | 10689527.16 |
| 46 | Spermine                                                                                    | C10H26N4   | 10606433.15 |
| 47 | Isoquinoline                                                                                | C9H7N      | 10130865.13 |
| 48 | 17beta-Hydroxy-2alpha-(methoxymethyl)-17-methyl-5alpha-androstan-3-one                      | C22H36O3   | 10099817.32 |
| 49 | 1-aminobenzocyclobutene                                                                     | C8H9N      | 9848515.772 |
| 50 | 4-Hydroxybenzaldehyde                                                                       | C7H6O2     | 9597369.832 |
| 51 | ethylbis(3-phenylpropyl)amine                                                               | C20H27N    | 8996161.213 |
| 52 | (5S)-5-methyl-5-[(1S)-4-methylcyclohex-3-en-1-yl]oxolan-2-one                               | C12H18O2   | 8877289.356 |
| 53 | Methylmalonate*                                                                             | C4H6O4     | 8770915.194 |
| 54 | 2,2-dimethylchromene-6-carboxylic acid*                                                     | C12H12O3   | 8571228.289 |
| 55 | 2-(hydroxymethyl)-5-{4-imino-3h-furo[3,2-                                                   | C11H13N3O5 | 8483840.879 |

|    |                                                                                                           |             |             |
|----|-----------------------------------------------------------------------------------------------------------|-------------|-------------|
|    | d]pyrimidin-7-yl} oxolane-3,4-diol                                                                        |             |             |
| 56 | 6-Pentadecylsalicylic acid                                                                                | C22H36O3    | 8466191.882 |
| 57 | 3,4-dihydroxy phenylethanol                                                                               | C8H10O3     | 8252296.013 |
| 58 | 4-Nitrophenol                                                                                             | C6H5NO3     | 8161880.433 |
| 59 | Pyrrolidin                                                                                                | C4H9N       | 7833950.86  |
| 60 | AMP*                                                                                                      | C10H14N5O7P | 7803247.736 |
| 61 | 7,8-dihydropterin*                                                                                        | C6H7N5O     | 7793293.292 |
| 62 | Glycyroside*                                                                                              | C27H30O13   | 7618282.592 |
| 63 | Podocarp-8-en-15-ol                                                                                       | C17H28O     | 7590182.815 |
| 64 | Retronecine                                                                                               | C8H13NO2    | 7471354.011 |
| 65 | 7-(4-Hydroxyphenyl)-1-phenyl-4-hepten-3-one                                                               | C19H20O2    | 7463950.36  |
| 66 | 2-Phosphoglycolate                                                                                        | C2H5O6P     | 7284769.853 |
| 67 | 6-hydroxy-5-[(3E)-5-hydroxy-3-methylpent-3-en-1-yl]-1,1,4a,6-tetramethyl-decahydronaphthalen-2-yl acetate | C22H38O4    | 7019581.196 |
| 68 | 2-Amino-2-methylpropanoate                                                                                | C4H9NO2     | 7018504.141 |
| 69 | Quinoline                                                                                                 | C9H7N       | 6961024.057 |
| 70 | Diisobutyl phthalate*                                                                                     | C16H22O4    | 6946504.205 |
| 71 | Indoline                                                                                                  | C8H9N       | 6816286.604 |
| 72 | 2-amino-2-(1-methyl-1H-pyrazol-4-yl)acetic acid                                                           | C6H9N3O2    | 6775181.313 |
| 73 | polygodial*                                                                                               | C15H22O2    | 6432403.196 |
| 74 | 13-Hydroxygermacrone*                                                                                     | C15H22O2    | 6350593.709 |
| 75 | Benzoate                                                                                                  | C7H6O2      | 6314128.429 |
| 76 | Formononetin-7-O-β-D-Apiofuranosyl-(1→6)-β-D-Glucopyranoside                                              | C27H30O13   | 5973233.813 |
| 77 | 3,7,11-trimethyl-2-oxa-6,10,13-triazatricyclo[7.3.1.05,13]tridecane                                       | C12H23N3O   | 5786848.222 |
| 78 | Vanillylamine                                                                                             | C8H11NO2    | 5693285.639 |
| 79 | 3,5-Di-tert-butylbenzoic acid                                                                             | C15H22O2    | 5554468.507 |
| 80 | 3',4',5'-O-Trimethyltricetin                                                                              | C18H16O7    | 5379497.071 |
| 81 | Tetradecasphinganine                                                                                      | C14H31NO2   | 5321807.597 |
| 82 | Dihydrobungeanol                                                                                          | C18H31NO2   | 5287637.493 |
| 83 | Benzimidazole                                                                                             | C7H6N2      | 5271578.811 |
| 84 | 4-amino-2-methylbutanoic acid                                                                             | C5H11NO2    | 5255335.52  |
| 85 | Agmatine                                                                                                  | C5H14N4     | 5171921.906 |
| 86 | 13-Methyl-8,11,13-Podocarpatriene-2,3-diol                                                                | C18H26O2    | 5117737.944 |
| 87 | dasyscyphin A                                                                                             | C22H36O4    | 5065653.52  |
| 88 | Cyclohexaneacetic acid                                                                                    | C8H14O2     | 5031125.285 |
| 89 | Dodecanamide                                                                                              | C12H25NO    | 4957887.01  |
| 90 | Turanose                                                                                                  | C12H22O11   | 4768149.08  |
| 91 | 11-HpODE                                                                                                  | C18H32O4    | 4694278.575 |

|     |                                       |            |             |
|-----|---------------------------------------|------------|-------------|
| 92  | N-Methylnicotinate                    | C7H7NO2    | 4628901.149 |
| 93  | N-[2-(3-indolyl)ethyl]succinamic acid | C14H16N2O3 | 4546020.265 |
| 94  | Histamine                             | C5H9N3     | 4225068.886 |
| 95  | N1-Methyl-2-pyridone-5-carboxamide    | C7H8N2O2   | 4176635.158 |
| 96  | cis-Aconitate                         | C6H6O6     | 4063689.151 |
| 97  | Chrysophanic acid 9-anthrone          | C15H12O3   | 3909816.099 |
| 98  | 1-Methylnicotinamide                  | C7H9N2O    | 3831332.734 |
| 99  | Indole-3-carboxylate                  | C9H7NO2    | 3725739.147 |
| 100 | Indole-5-carboxylic acid              | C9H7NO2    | 3649342.601 |
| 101 | 2',4'-Dimethylacetophenone            | C10H12O    | 3581486.465 |
| 102 | Indole-3-carboxaldehyde               | C9H7NO     | 3559580.731 |
| 103 | Isobutyryl carnitine                  | C11H21NO4  | 3542594.711 |
| 104 | D-Gluconic acid                       | C6H12O7    | 3504682.112 |
| 105 | Ajaconine                             | C22H33NO3  | 3494011.578 |

264 \*: There are isomers present in this substance.

265

266 **Table S4** Information of top 10 Active Components From CEVs

267

| Number | Compounds                      | Formula   | CAS        | Structure                                                                             |
|--------|--------------------------------|-----------|------------|---------------------------------------------------------------------------------------|
| 1      | 4',5,6,7-Tetramethoxyflavanone | C19H20O6  | 2569-77-9  | 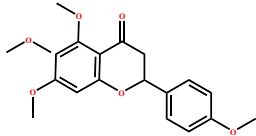 |
| 2      | 3',4',5'-O-Trimethyltricetin   | C18H16O7  | 18103-42-9 |  |
| 3      | Dihydrobungeanool              | C18H31NO2 | -          |  |
| 4      | Arcapillin                     | C18H16O8  | 83162-82-7 |  |
| 5      | Embelin                        | C17H26O4  | 550-24-3   |  |

|    |                      |                                                 |             |                                                                                      |
|----|----------------------|-------------------------------------------------|-------------|--------------------------------------------------------------------------------------|
| 6  | Emodin               | C <sub>15</sub> H <sub>10</sub> O <sub>5</sub>  | 518-82-1    | 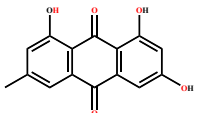  |
| 7  | isoemodin            | C <sub>15</sub> H <sub>10</sub> O <sub>5</sub>  | -           |   |
| 8  | Dodecanamide         | C <sub>12</sub> H <sub>25</sub> NO              | -           |   |
| 9  | Glycyroside          | C <sub>27</sub> H <sub>30</sub> O <sub>13</sub> | 125310-04-5 |   |
| 10 | Isobutyryl carnitine | C <sub>11</sub> H <sub>21</sub> NO <sub>4</sub> | 25518-49-4  |  |

268  
269  
270  
271  
272  
273  
274  
275  
276  
277  
278  
279  
280  
281  
282

283 **Table S5** Evaluation of Key Topological Parameters in the Protein-Protein Interaction  
 284 Network. (the top 10 Degrees)

285  
 286

| Rank | Name   | Betweenness          | Closeness          | Degree |
|------|--------|----------------------|--------------------|--------|
| 1    | STAT3  | 0.05543660253705654  | 0.6518518518518518 | 47     |
| 2    | TP53   | 0.15337835382552095  | 0.6666666666666666 | 47     |
| 3    | SRC    | 0.07034453302411396  | 0.6470588235294118 | 46     |
| 4    | AKT1   | 0.047189220643756656 | 0.6285714285714286 | 44     |
| 5    | EGFR   | 0.06649664076977446  | 0.6285714285714286 | 43     |
| 6    | IL6    | 0.03690167662309724  | 0.6153846153846154 | 39     |
| 7    | BCL2   | 0.058564962620918884 | 0.6027397260273972 | 38     |
| 8    | TNF    | 0.051546890192323565 | 0.5789473684210527 | 35     |
| 9    | PIK3CA | 0.0278343970798876   | 0.5605095541401274 | 32     |
| 10   | JUN    | 0.018148358887829875 | 0.5789473684210527 | 32     |

287

288 **Table S6** Docking Analysis of the Top 10 Active Ligands with Core Receptor Targets

| Active Compounds               | Docking Score (kcal/mol) |
|--------------------------------|--------------------------|
| 4',5,6,7-Tetramethoxyflavanone | -6.04                    |
| 3',4',5'-O-Trimethyltricetin   | -6.18                    |
| Dihydrobungeanool              | -6.76                    |
| Arcapillin                     | -5.79                    |
| Embelin                        | -6.64                    |
| Emodin                         | -5.51                    |
| isoemodin                      | -5.41                    |
| Dodecanamide                   | -6.07                    |
| Glycyroside                    | -7.53                    |
| Isobutyryl carnitine           | -5.99                    |

289

290
